# Supplementary material for: Age, growth, reproduction and management of Southwestern Atlantic’s largest and endangered herbivorous reef fish, Scarus trispinosus Valenciennes, 1840
Source: PeerJ. 2019 Aug 30;7:e7459. doi: 10.7717/peerj.7459 (PMC6718160; doi:10.7717/peerj.7459)
Supplement: Supplemental Information 13 [file peerj-07-7459-s013.xlsx]

## Sheet: marginal increment
Number	Month	Year	TL	Otl wei	MI (%)	Years
4876	1	2011	29	0.024	17.1171	6
4872	1	2011	31.5	0.022	43.3036	4
4878	1	2011	32	0.017	54.5455	5
4820	1	2011	33.5	0.022	20	4
4870	1	2011	34	0.02	24.3478	6
4879	1	2011	35	0.022	21.2121	4
5681	1	2012	36.5	0.022	79.5031	6
5677	1	2012	42	0.03	78.7234	6
4823	1	2011	45	0.032	72.0339	5
5670	1	2012	45		48.3871	7
5675	1	2012	45.5	0.03	94.898	4
5669	1	2012	46	0.024	88.6179	4
4818	1	2011	48	0.035	91.2409	7
5671	1	2012	48.5	0.028	61.9433	3
5678	1	2012	50	0.04	82.9545	6
4947	2	2011	28	0.015	61.9718	6
4955	2	2011	28.5	0.017	20	3
4942	2	2011	29	0.015	65.493	6
4956	2	2011	29	0.014	37.1069	3
4937	2	2011	30		24.8756	4
4939	2	2011	30	0.018	28.3186	5
4950	2	2011	30	0.015	31.9444	6
4941	2	2011	31	0.018	28.6624	5
4952	2	2011	31	0.018	19.6078	6
4954	2	2011	31	0.017	44.4444	4
4948	2	2011	31.5		38.5417	7
4953	2	2011	31.5	0.019	58.6538	6
4949	2	2011	32	0.016	34.5679	4
5719	2	2012	43	0.035	44.1964	6
5717	2	2012	46		65	7
5716	2	2012	47	0.033	85.2941	8
5730	2	2012	49.5	0.041	62.3288	5
5723	2	2012	50	0.029	64.9805	6
5028	3	2011	26.5	0.012	22.3368	3
5020	3	2011	30	0.015	32.9545	5
5025	3	2011	32	0.02	41.2281	5
5026	3	2011	32	0.017	58.0838	5
5027	3	2011	32	0.02	45.4545	4
5814	3	2012	34	0.022	65.6085	5
5016	3	2011	36	0.023	38.1944	6
5813	3	2012	36.5	0.026	48.9583	6
5806	3	2012	38	0.027	72.5	4
5807	3	2012	38		17.7778	5
5017	3	2011	39.5	0.023	25.6667	4
4141	3	2007	40	0.026	53.5948	7
5818	3	2012	42	0.028	101.923	7
4139	3	2007	44	0.03	18.9516	5
5024	3	2011	45		18.8235	6
5816	3	2012	45	0.0326	69.4444	6
5022	3	2011	46.5	0.03	49.4048	7
5125	4	2011	38		29.3651	5
5117	4	2011	40	0.028	10.5556	4
5123	4	2011	40	0.021	16.0156	5
5831	4	2012	42		75.9804	8
5116	4	2011	43		9.33333	8
5834	4	2012	43	0.029	107.874	6
5100	4	2011	46.5	0.036	75.502	5
5829	4	2012	49	0.035	85.7143	4
5825	4	2012	50	0.047	59.4872	7
5923	5	2012	28	0.025	11.2903	5
5905	5	2012	37	0.023	70.3125	7
5915	5	2012	37	0.021	22.0339	7
5919	5	2012	38	0.03	15.5462	4
5902	5	2012	39		18.8119	6
5917	5	2012	40	0.025	30.9804	4
5922	5	2012	42	0.024	30.1136	6
5921	5	2012	43	0.035	10	7
5920	5	2012	48		73.3333	7
5179	5	2011	49	0.036	34.5133	5
5892	5	2012	50	0.029	61.7647	6
5898	5	2012	50	0.044	7.69231	8
5926	6	2012	35	0.024	44.1379	4
5927	6	2012	36	0.023	62.3656	5
5934	6	2012	36	0.02	21.4876	6
5932	6	2012	37	0.022	70.6422	7
5964	6	2012	37	0.024	89.0244	5
5941	6	2012	38	0.02	120.93	7
5993	6	2012	48	0.041	56.9061	8
3148	7	2006	32.7	0.019	47.4074	7
3152	7	2006	32.9	0.022	31.6456	6
6043	7	2012	33	0.019	15.6098	5
3149	7	2006	33.3	0.022	66	4
3150	7	2006	34.6	0.023	48.2353	5
6049	7	2012	35		18.239	5
3147	7	2006	36	0.019	31.7757	4
6051	7	2012	38	0.025	17.1053	9
6056	7	2012	38	0.024	15.8333	6
6032	7	2012	47	0.03	34.4828	5
6038	7	2012	47	0.041	52.381	7
6031	7	2012	48	0.032	97.561	7
6048	7	2012	48	0.035	40.3101	7
6059	8	2012	29		15.625	7
6072	8	2012	31	0.018	60.1942	5
6081	8	2012	31	0.019	24.2718	6
6073	8	2012	32	0.017	40.3509	4
6084	8	2012	33	0.019	77.1654	6
6063	8	2012	34	0.02	15.3333	8
6066	8	2012	34	0.022	98.6014	6
3230	8	2006	34.5	0.021	83.5749	4
3237	8	2006	34.9	0.024	51.735	4
6078	8	2012	35	0.021	89.3939	5
3241	8	2006	35.9		32.0611	5
3233	8	2006	37	0.023	37.4101	6
3240	8	2006	37	0.021	41.1765	3
3227	8	2006	41.5	0.023	24.1611	5
3226	8	2006	42.2	0.03	31.4488	3
3229	8	2006	45.5	0.031	24.6667	5
6088	8	2012	48	0.0348	32.8283	7
6094	8	2012	50	0.026	66.9683	5
4420	9	2010	34		48.0315	4
4434	9	2010	34.5	0.017	24.3902	4
4429	9	2010	35	0.022	35.7143	5
4385	9	2010	36	0.024	107.784	5
4388	9	2010	36	0.022	43.949	4
4440	9	2010	36		58.5635	4
4391	9	2010	37.5	0.025	73.0038	6
4427	9	2010	38	0.022	70.0855	5
6338	9	2012	41		31.0219	6
6348	9	2012	41	0.024	44.0476	9
6343	9	2012	42	0.026	45.4212	4
6339	9	2012	43	0.024	86.4078	7
4435	9	2010	43.5	0.028	136.486	7
4437	9	2010	43.5		62.5	5
6340	9	2012	44	0.03	61.9672	6
6341	9	2012	44	0.03	28.4615	8
6347	9	2012	44	0.032	136.134	7
4382	9	2010	44.5	0.033	89.9083	5
6335	9	2012	45	0.034	36.0656	9
4439	9	2010	47.5	0.03	57.6923	4
4493	10	2010	30.5	0.02	40.2174	4
5582	10	2011	31		50	5
4496	10	2010	32	0.019	58.7719	5
5580	10	2011	33		7.25806	6
4492	10	2010	33.5	0.019	59.0909	4
6133	10	2012	38	0.026	46.2121	8
6162	10	2012	38	0.044	76	9
6173	10	2012	41		48.4043	5
4581	10	2010	43	0.031	50	8
4552	10	2010	44	0.028	47.3684	6
4578	10	2010	44	0.031	99.4186	6
6175	10	2012	45		16.0839	8
6154	10	2012	47	0.039	30.1075	6
6176	10	2012	47	0.031	50.8197	6
6177	10	2012	48	0.034	104.762	7
4593	10	2010	49	0.031	91.4894	5
6129	10	2012	50	0.038	47.3684	8
6158	10	2012	50	0.039	76.4228	7
4652	11	2010	38	0.03	42.3913	6
5607	11	2011	39.5		13.5593	7
4658	11	2010	42	0.041	24.2038	7
4654	11	2010	43.5	0.037	62.8205	7
4665	11	2010	45	0.029	33.5526	5
4667	11	2010	45	0.033	90.6542	6
4653	11	2010	46	0.033	59.6491	7
4672	11	2010	46	0.032	62.7273	7
4664	11	2010	47.5		94.4954	7
4656	11	2010	48	0.04	29.4118	6
4670	11	2010	48	0.041	58.4071	9
4660	11	2010	50	0.037	67.1569	5
4668	11	2010	50	0.045	53.7879	8
6260	12	2012	14	0.0062	4.71204	2
6259	12	2012	15	0.0063	2.16867	2
6244	12	2012	16	0.0072	89.8305	3
6247	12	2012	16	0.0063	34.9421	2
6243	12	2012	18	0.0072	30.6962	2
6257	12	2012	18	0.0084	17.5	3
6253	12	2012	18.5	0.0091	9.64467	3
6242	12	2012	21.5	0.0098	11.8571	2
4739	12	2010	39	0.024	87.8505	6
4728	12	2010	42.5	0.031	15.0376	5
4722	12	2010	44	0.031	50.8475	7
4724	12	2010	50		28.5714	6
4740	12	2010	50	0.036	25.1429	5
5642	12	2011	50.4	0.033	61.5385	6
4659	11	2010	50.5	0.042	27.6836	6
4438	9	2010	51	0.041	68.8525	7
4666	11	2010	51	0.043	36.8794	6
6148	10	2012	51	0.038	78.4615	8
5805	3	2012	51.2	0.045	58.2609	6
4662	11	2010	52	0.031	46.2069	6
4663	11	2010	52	0.044	73.2394	7
4742	12	2010	52	0.041	20	7
5324	7	2011	52	0.043	36.5297	6
5326	7	2011	52	0.041	71.8519	5
5808	3	2012	52	0.048	70.6587	8
5830	4	2012	52	0.024	102.055	7
5638	12	2011	52.8	0.037	34.9112	6
4549	10	2010	53	0.048	15.2672	7
5653	12	2011	53	0.036	89.7727	6
5729	2	2012	53	0.038	40.2174	10
5824	4	2012	53	0.047	100.625	6
6039	7	2012	53	0.04	70.1754	5
6093	8	2012	53	0.045	72.549	9
5718	2	2012	53.5	0.036	77.5194	6
4736	12	2010	54	0.045	33.1776	8
4825	1	2011	54	0.046	18.3333	6
4863	1	2011	54	0.043	31.7972	9
5177	5	2011	54	0.047	75	6
5238	6	2011	54	0.048	67.5472	6
5240	6	2011	54	0.041	43.5897	5
5896	5	2012	54		28.3333	8
5639	12	2011	54.6	0.046	76.1905	7
4569	10	2010	55	0.045	73.0769	7
4571	10	2010	55	0.044	79.661	8
4585	10	2010	55	0.054	92.8571	9
4729	12	2010	55	0.042	25.3333	6
5429	8	2011	55	0.055	96.3636	10
5432	8	2011	55	0.055	15.3846	9
5733	2	2012	55	0.043	51.145	7
5176	5	2011	56	0.04	48.3871	7
5721	2	2012	56	0.04	43.4555	8
6163	10	2012	56	0.037	30.4348	6
5827	4	2012	56.5	0.05	42.7807	5
4725	12	2010	57	0.054	40.5983	9
5173	5	2011	57	0.044	41.6667	8
5334	7	2011	57	0.042	80.0797	7
5425	8	2011	57	0.051	114.943	8
5427	8	2011	57	0.042	60.6452	4
5440	8	2011	57	0.043	43.0435	7
6156	10	2012	57	0.044	23.4568	8
6304	9	2012	57	0.046	36.6013	11
4651	11	2010	58		61.1538	6
4655	11	2010	58	0.043	60.5911	7
5035	3	2011	58	0.051	68.3333	9
5418	8	2011	58	0.039	83.1081	5
6152	10	2012	58	0.058	38.6076	9
5101	4	2011	59	0.046	31.5508	6
5114	4	2011	59	0.035	27.1605	6
5241	6	2011	59	0.043	31.6384	5
5426	8	2011	59	0.043	95.935	8
5446	8	2011	59	0.067	27.4725	6
5657	12	2011	59	0.049	85.2941	5
5980	6	2012	59	0.053	66.6667	9
6138	10	2012	59	0.037	65.5629	8
5636	12	2011	59.5	0.043	60	8
4727	12	2010	60		41.2162	6
4733	12	2010	60	0.047	100.943	8
4889	2	2011	60	0.081	102.703	18
4891	2	2011	60		35.2941	9
5034	3	2011	60	0.044	79.7753	8
5043	3	2011	60	0.048	18.5629	9
5109	4	2011	60	0.045	80.4878	7
5110	4	2011	60	0.041	53.1073	6
5424	8	2011	60	0.047	31.9149	6
5728	2	2012	60	0.055	7.32984	8
5970	6	2012	60	0.052	22.7488	5
5972	6	2012	60	0.053	12.1387	7
5650	12	2011	60.5	0.058	79.2899	6
4561	10	2010	61	0.042	94.5946	5
4869	1	2011	61	0.047	13.2075	8
5182	5	2011	61	0.045	31.7919	9
5232	6	2011	61	0.044	61.5385	7
5835	4	2012	61	0.043	32.0225	8
5838	4	2012	61	0.056	56.8182	7
5891	5	2012	61	0.054	28.8372	7
5103	4	2011	61.5	0.045	58.216	5
4754	12	2010	62	0.047	58.3333	9
5235	6	2011	62	0.056	72.6316	7
5314	7	2011	62	0.058	55.7604	8
5398	7	2011	62		95.9184	5
5431	8	2011	62	0.043	52.8571	4
5644	12	2011	62	0.057	122.034	7
5826	4	2012	62	0.054	108.14	7
6141	10	2012	62	0.039	83.1325	8
6159	10	2012	62	0.064	62.2951	9
5044	3	2011	62.5	0.052	76.5957	7
5648	12	2011	62.5	0.055	92.233	8
5175	5	2011	63	0.051	40.2062	9
5227	6	2011	63	0.057	54.386	7
5313	7	2011	63	0.051	88.3721	9
5046	3	2011	63.5	0.06	36.2205	7
4463	9	2010	64	0.059	30.7018	7
4882	2	2011	64	0.075	34.4262	8
5230	6	2011	64	0.046	47.4074	5
5257	6	2011	64	0.058	78.1609	8
5310	7	2011	64	0.055	78.2946	8
5311	7	2011	64	0.06	47.0238	7
5995	6	2012	64	0.066	14.9425	9
6020	7	2012	64	0.06	91.2195	10
6097	8	2012	64	0.119	17.3913	20
6208	11	2012	64		39.1608	9
5052	3	2011	65	0.05	40.3315	8
5205	5	2011	65	0.056	26.087	8
5439	8	2011	65	0.041	80.9524	9
5448	8	2011	66	0.056	99.2126	6
4881	2	2011	67	0.064	29.1667	14
5199	5	2011	67	0.095	21.3115	13
5203	5	2011	67	0.06	37.3832	8
5209	5	2011	67	0.056	54.5455	8
4883	2	2011	68	0.09	76.506	10
5206	5	2011	68	0.055	50.5556	9
5234	6	2011	68	0.055	70.437	6
5246	6	2011	68	0.052	49.8008	8
5386	7	2011	68	0.068	79.2683	7
5394	7	2011	68	0.048	75.3425	9
5421	8	2011	68	0.058	34.3066	6
6107	8	2012	68	0.074	161.905	12
4464	9	2010	69	0.078	75	13
4892	2	2011	69	0.063	83.2258	8
5259	6	2011	69	0.069	65.2174	15
5260	6	2011	69	0.055	89.3333	10
5316	7	2011	69	0.057	81.0976	6
5388	7	2011	69	0.081	79.1667	15
4894	2	2011	70	0.069	51.2712	9
5112	4	2011	70	0.052	66.6667	8
5208	5	2011	70	0.055	74.8299	11
5256	6	2011	70	0.078	39.4619	7
5389	7	2011	70	0.071	71.3043	9
5397	7	2011	70	0.064	47.191	8
6002	7	2012	70	0.058	61.3636	11
6206	11	2012	70	0.068	76.8293	10
6211	11	2012	70	0.081	61.9048	11
4890	2	2011	71	0.071	84.0708	12
5087	4	2011	71	0.072	46.8468	9
5253	6	2011	71	0.068	79.3388	8
5395	7	2011	71	0.081	63.7795	10
6092	8	2012	71	0.082	65.9091	13
6201	11	2012	71		52.9412	10
5053	3	2011	72	0.056	28.6957	10
5204	5	2011	72	0.067	22.7451	9
6205	11	2012	72	0.068	255.769	14
4465	9	2010	73		16.6667	11
5201	5	2011	73	0.065	25	10
5207	5	2011	73	0.074	51.4706	9
5252	6	2011	73	0.061	74.5098	10
5315	7	2011	73	0.074	39.9103	6
5385	7	2011	73	0.062	73.0496	6
5449	8	2011	73		50.5263	7
6004	7	2012	73	0.08	15.9574	11
6210	11	2012	73	0.08	60.7843	12
5200	5	2011	74	0.074	32.1429	6
5249	6	2011	74		73.6842	6
5417	8	2011	74	0.075	120.339	14
5051	3	2011	75	0.062	36.0577	9
5248	6	2011	75	0.072	46.1538	13
5254	6	2011	75	0.108	44.5783	17
5383	7	2011	75	0.085	38.5417	11
5390	7	2011	75	0.074	56.8915	8
6026	7	2012	75		47.2727	11
5303	6	2011	76	0.09	61.6766	14
6194	11	2012	76	0.102	122.388	17
4852	1	2011	77	0.068	79.8995	7
4853	1	2011	77	0.1	50	18
4854	1	2011	77	0.1	36.4706	22
5255	6	2011	77	0.081	134.694	15
5312	7	2011	77		87.5912	9
5672	1	2012	77	0.054	47.973	7
4676	11	2010	78	0.078	66.6667	17
4679	11	2010	78	0.07	41.1429	7
5164	5	2011	78	0.07	55.3719	12
5399	7	2011	78	0.068	65.8385	10
6100	8	2012	78	0.061	100	8
4473	9	2010	79	0.08	44.0678	13
4677	11	2010	79	0.094	22.8916	17
4755	12	2010	79	0.078		13
5297	6	2011	79	0.086	67.6829	10
5836	4	2012	79	0.111	86.6667	13
5393	7	2011	80	0.077	61.6505	9
5304	6	2011	81	0.102	133.333	14
4143	3	2007	83	0.108	68.8889	19
5423	8	2011	83	0.081	68.9655	9
6090	8	2012	83	0.092	14.1509	18
5102	4	2011	84	0.099	29.7872	18
5086	4	2011	86	0.077	42.2222	12
5343	7	2011	86	0.09	56.8862	10
